# Supplementary material for: Tailoring of spectral response and intramolecular charge transfer in β-enaminones through band gap tuning: synthesis, spectroscopy and quantum chemical studies
Source: Royal Society of Chemistry journal article supplement (doi:10.1039/c6ra00376a), 2016-01-01
Supplement: c6ra00376a1.pdf [file c6ra00376a1.pdf]

*Supporting Information for*

**Tailoring of Spectral Responses and Intramolecular Charge Transfer of  $\beta$ -enaminones through HOMO - LUMO Band Gap Tuning: Synthesis, Spectroscopic and Quantum Chemical Studies**

Ramprasad Misra<sup>a</sup>, Pushkin Chakraborty<sup>b</sup>, Subhas C. Roy<sup>b</sup>, D.K. Maity<sup>c,d</sup> and S.P. Bhattacharyya<sup>e\*</sup>

*<sup>a</sup>Department of Physical Chemistry, <sup>b</sup>Department of Organic Chemistry,*

*Indian Association for the Cultivation of Science, Jadavpur, Kolkata 700032, India*

*<sup>c</sup>Theoretical Chemistry Section, Chemistry Group, Bhabha Atomic Research Centre,*

*Mumbai 400085, India*

*<sup>d</sup>Homi Bhabha National Institute, Training School Complex, Anushaktinagar, Mumbai 400094, India*

*<sup>e</sup>Department of Chemistry, Indian Institute of Technology Bombay, Mumbai 400076, India*

## Figure Caption

**Fig. S1:** The ground state optimized structures of PACO in the (a) gas phase, (b) in SCRF of water (c) 1:3 microcluster with water and (d) PACO:3H<sub>2</sub>O microcluster macrosolvated with water. The macroscopic solvation has been taken care of using Cramer and Truhler's SMD model.

**Fig. S2:** The ground state optimized structures of OACO in the (a) gas phase, (b) in SCRF of water (c) 1:4 microcluster with water and (d) OACO:4H<sub>2</sub>O microcluster macrosolvated with water. The macroscopic solvation has been taken care of using Cramer and Truhler's SMD model.

**Fig S3:** The ground state optimized structures of NACO in the (a) gas phase, (b) in SCRF of water (c) 1:5 microcluster with water and (d) NACO:5H<sub>2</sub>O microcluster macrosolvated with water. The macroscopic solvation has been taken care of using Cramer and Truhler's SMD model.

**Fig S4:** The room temperature emission spectra of NACO in cyclohexane (CYC), ethanol, methanol and water. The excitation wavelength ( $\lambda_{ex}$ ) is 360 nm.

**Table S1: All components of polarizability ( $\alpha$ ) and its average value ( $\alpha_{av}$ ) of PACO, OACO and NACO and their microhydrates, as calculated using B3LYP functional and aug-cc-pVDZ basis set. All values are in atomic unit (a.u.).**

| <b>System</b>               | $\alpha_{xx}$ | $\alpha_{xy}$ | $\alpha_{yy}$ | $\alpha_{xz}$ | $\alpha_{yz}$ | $\alpha_{zz}$ | $\alpha_{av}$ |
|-----------------------------|---------------|---------------|---------------|---------------|---------------|---------------|---------------|
| <b>PACO</b>                 | 229.64        | -6.71         | 159.47        | -2.81         | 7.04          | 107.12        | 165.41        |
| <b>PACO.3H<sub>2</sub>O</b> | 271.40        | 8.97          | 201.68        | 7.59          | -7.71         | 127.96        | 200.35        |
| <b>OACO</b>                 | 257.97        | -4.11         | 178.09        | -1.02         | 6.13          | 121.85        | 185.97        |
| <b>OACO.4H<sub>2</sub>O</b> | 318.06        | 0.68          | 231.88        | -0.99         | -9.63         | 147.89        | 232.62        |
| <b>NACO</b>                 | 300.16        | -7.22         | 178.97        | -1.14         | 7.30          | 109.09        | 196.07        |
| <b>NACO.5H<sub>2</sub>O</b> | 389.07        | -11.11        | 246.87        | -1.13         | -7.07         | 143.56        | 259.83        |

**Table S2: All components of first hyper-polarizability and its total value ( $\beta_{total}$ ) of PACO, OACO and NACO and their microhydrates, as calculated using B3LYP functional and aug-cc-pVDZ basis set. All values are in atomic unit (a.u.).**

| System                 | $\beta_{xxx}$ | $\beta_{yxx}$ | $\beta_{xyy}$ | $\beta_{yyy}$ | $\beta_{zxx}$ | $\beta_{xyz}$ | $\beta_{zyy}$ | $\beta_{xzz}$ | $\beta_{yzz}$ | $\beta_{zzz}$ | $\beta_{total}$ |
|------------------------|---------------|---------------|---------------|---------------|---------------|---------------|---------------|---------------|---------------|---------------|-----------------|
| PACO                   | 247.42        | -16.23        | -16.55        | 19.56         | -373.71       | 36.03         | 22.76         | 172.79        | 6.40          | 79.25         | 486.68          |
| PACO.3H <sub>2</sub> O | 991.27        | 50.07         | -186.01       | -19.85        | -33.58        | -11.46        | -11.06        | -44.98        | 0.78          | -3.69         | 762.44          |
| OACO                   | 1094.94       | 18.25         | -20.86        | -37.19        | -391.43       | -37.55        | 36.39         | 214.84        | 15.27         | 43.86         | 1325.95         |
| OACO.4H <sub>2</sub> O | 1589.83       | -41.34        | -20.62        | -54.46        | -514.57       | -15.40        | 16.90         | 157.74        | -7.18         | 54.63         | 1785.84         |
| NACO                   | -3359.79      | -192.76       | 62.73         | 18.78         | -272.94       | 26.12         | 25.67         | 302.17        | 15.06         | 29.42         | 3007.01         |
| NACO.5H <sub>2</sub> O | 3546.68       | 7.87          | -48.64        | 20.62         | -1981.47      | -83.33        | 43.28         | 660.29        | 41.01         | -53.69        | 4611.30         |

**Table S3: The dominant contributions on vertical transition of first three excited states ( $S_1$ ,  $S_2$  and  $S_3$ ) of PACO, OACO and NACO and their 1:3, 1:4 and 1:5 molecular clusters, respectively with water in the gas phase, in SCRF of water, as calculated using TDDFT (CAM-B3LYP functional and aug-cc-pVTZ basis set).**

| <b>Molecule/Medium</b> | <b>PACO</b>                              | <b>OACO</b>                      | <b>NACO</b>                          |
|------------------------|------------------------------------------|----------------------------------|--------------------------------------|
| <b>Gas Phase</b>       |                                          |                                  |                                      |
| $S_1$                  | (H-1) – (L+1) 0.46                       | (H-1) – (L+1) 0.55               | (H-4) – L 0.62                       |
| $S_2$                  | H – L 0.62                               | H – (L+1) 0.44                   | H – L 0.37                           |
| $S_3$                  | -                                        | H – (L+3) 0.52<br>H – (L+1) 0.27 | H – L 0.51<br>(H-1) – (L+1) 0.21     |
| <b>In SCRF</b>         |                                          |                                  |                                      |
| $S_1$                  | (H-1) – L 0.49                           | (H-1) – (L+1) 0.52               | (H-4) – L 0.64                       |
| $S_2$                  | H – L 0.65                               | H – L 0.46<br>H – (L+3) 0.54     | (H-1) – L 0.33<br>(H-1) – (L+1) 0.41 |
| $S_3$                  | -                                        | H – L 0.20                       | H – L 0.64                           |
| <b>Cluster</b>         |                                          |                                  |                                      |
| $S_1$                  | H – (L+1) 0.65                           | H – (L+1) 0.66                   | H – L 0.66                           |
| $S_2$                  | (H-1) – (L+1) 0.39<br>(H-2) – (L+1) 0.39 | (H-2) – (L+1) 0.59               | (H-8) – L 0.65                       |
| $S_3$                  | -                                        | H – (L+3) 0.38                   | (H-2) – (L+2) 0.56                   |
| <b>Cluster in SCRF</b> |                                          |                                  |                                      |
| $S_1$                  | H – (L+1) 0.62<br>H-L 0.22               | H – (L+1) 0.64                   | H – L 0.64                           |
| $S_2$                  | (H-1) – (L+1) 0.56                       | (H-2) – (L+1) 0.60               | (H-8) – L 0.60                       |
| $S_3$                  | -                                        | H – (L+2) 0.43                   | (H-2) – (L+2) 0.54                   |

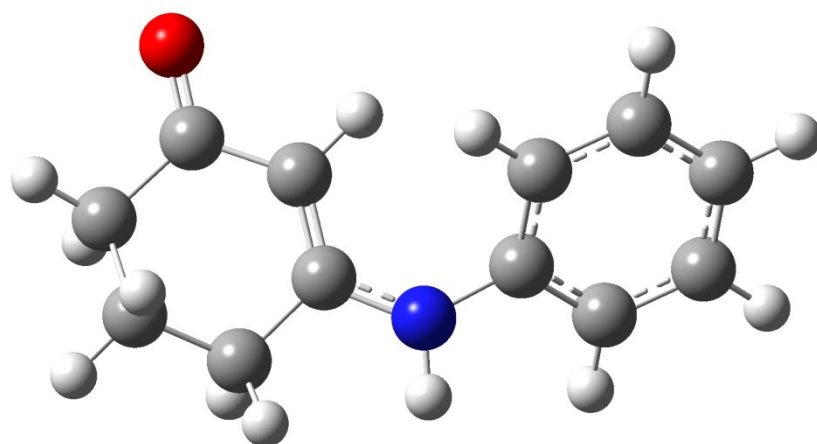

**Fig. S1(a)**

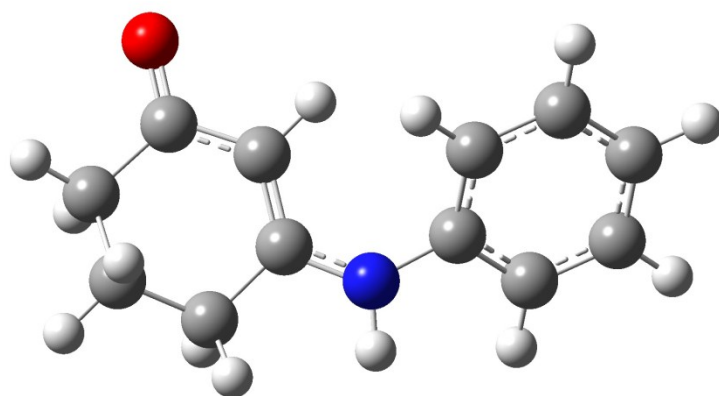

**Fig. S1(b)**

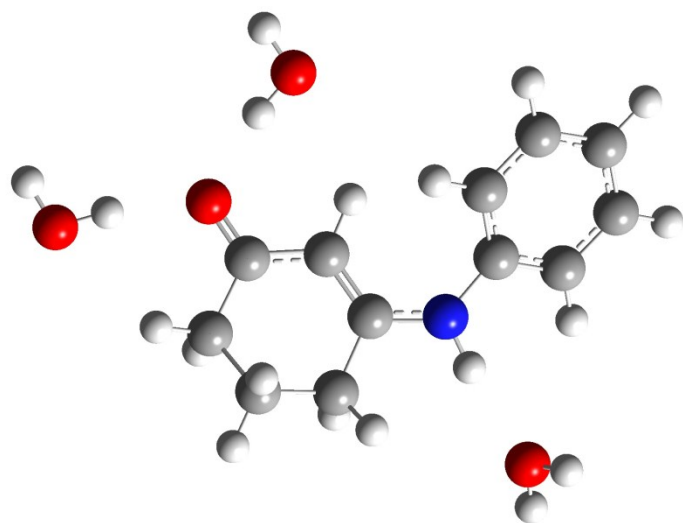

**Fig. S1(c)**

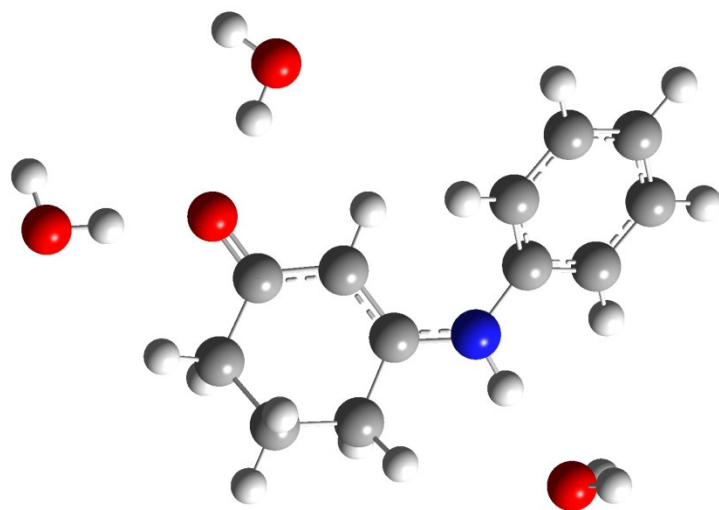

**Fig. S1(d)**

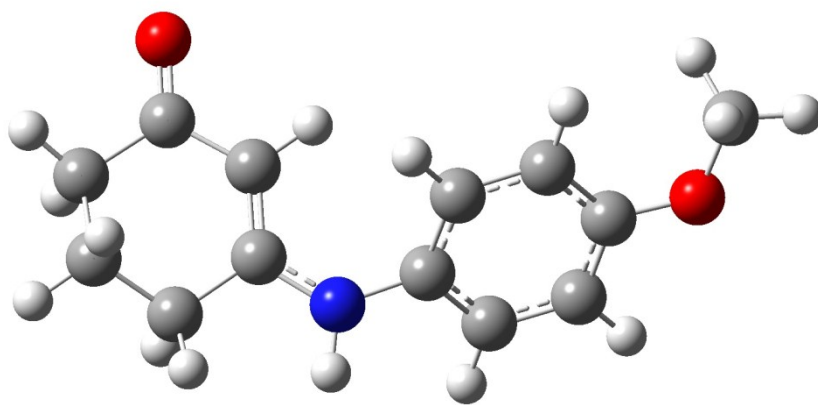

**Fig. S2(a)**

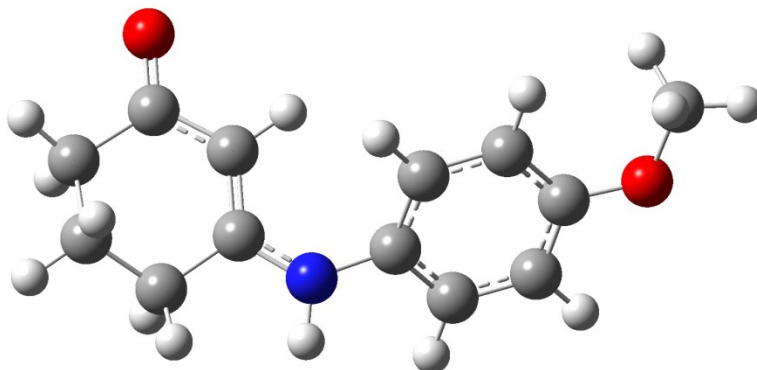

**Fig. S2(b)**



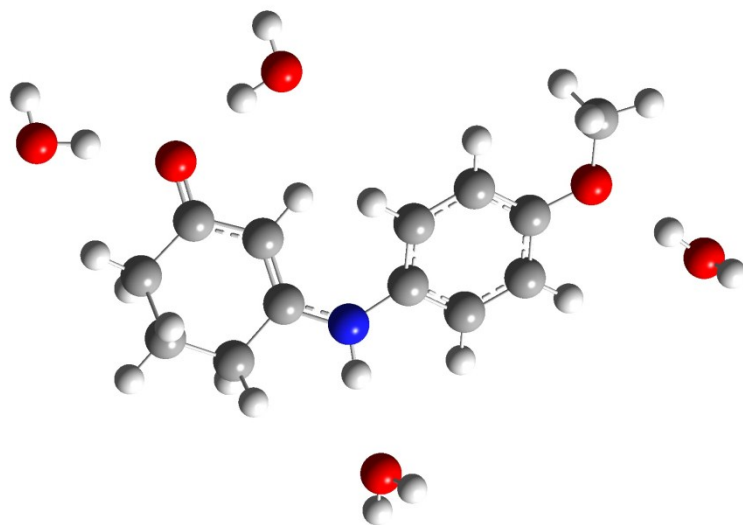

**Fig. S2(c)**

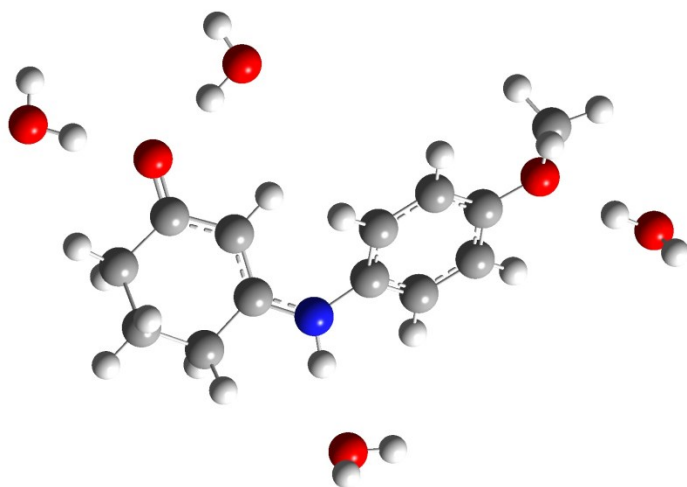

**Fig. S2(d)**

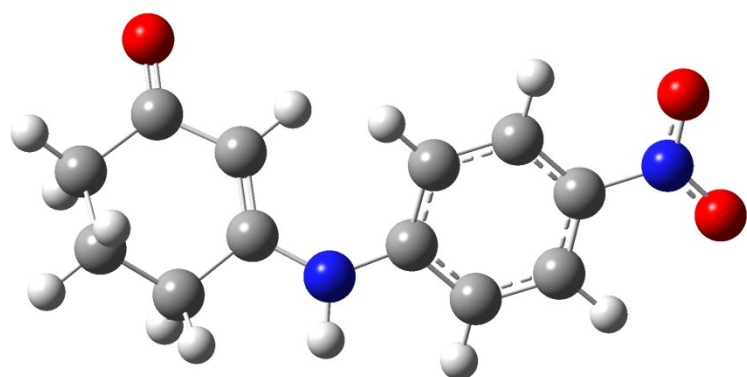

**Fig. S3(a)**

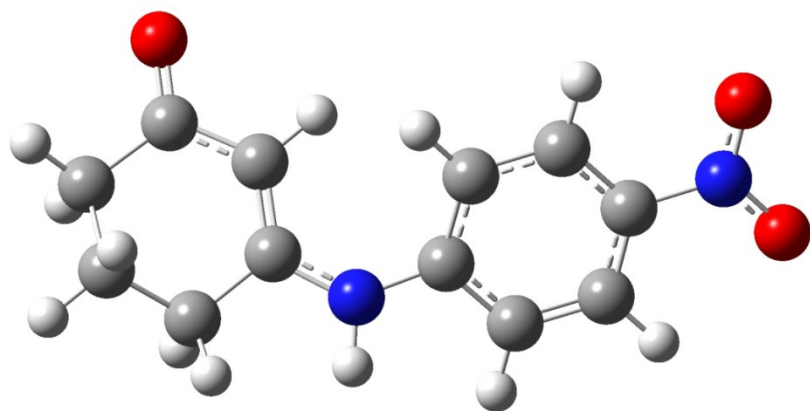

**Fig. S3(b)**

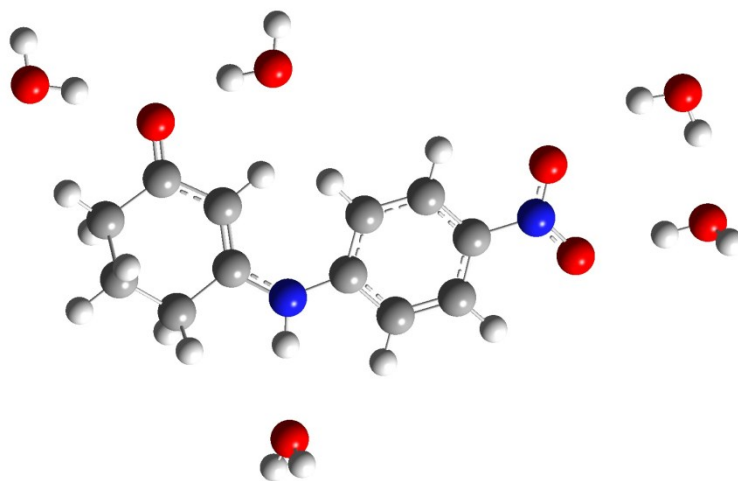

**Fig. S3(c)**

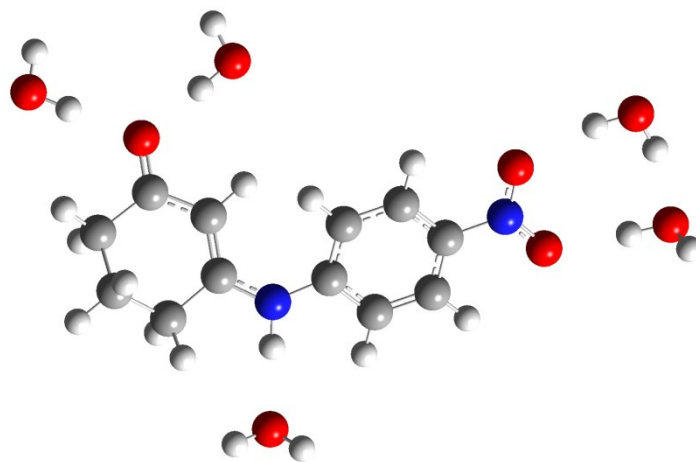

**Fig. S3(d)**

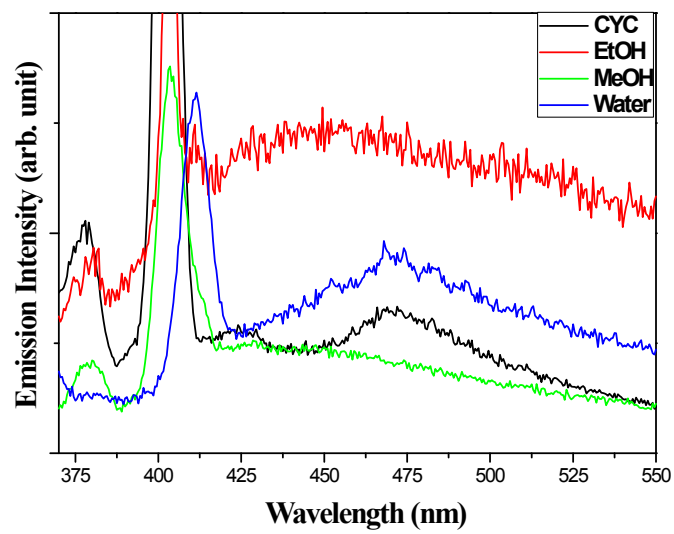

**Fig. S4**
